# Supplementary material for: Exposure to SARS-CoV-2 generates T-cell memory in the absence of a detectable viral infection
Source: PubMed Central journal article supplement (PMC7979809; doi:10.1038/s41467-021-22036-z), 2021-03-19
Supplement: 41467_2021_22036_MOESM1_ESM.pdf [file 41467_2021_22036_MOESM1_ESM.pdf]

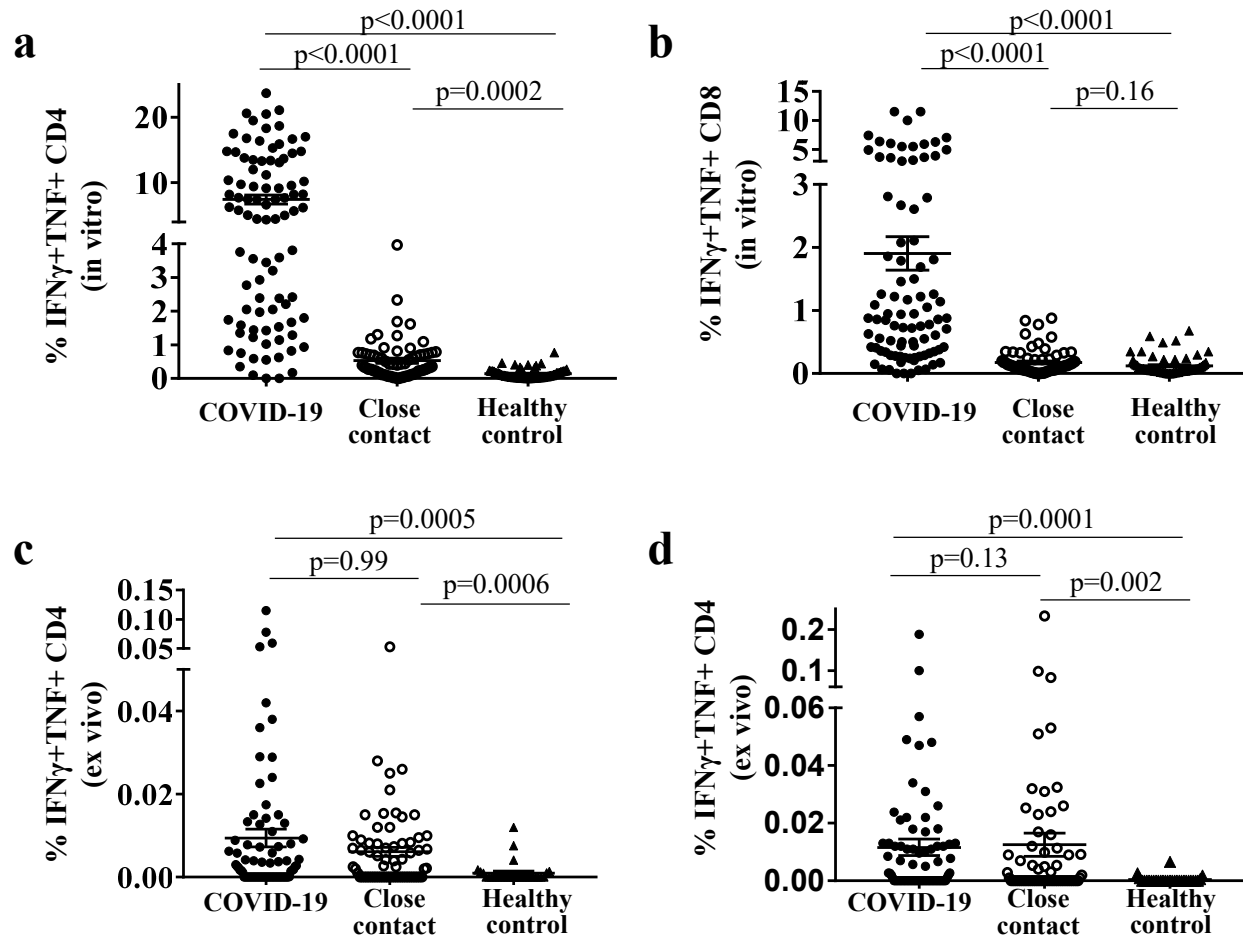

**Supplementary Figure 1: Dual expression of IFN $\gamma$  and TNF in SARS-CoV-2 peptide stimulated T cells in recovered COVID-19 patients, close contacts and unexposed healthy donors.** Graphs show the frequency of IFN $\gamma$  and TNF dual expressing cells in CD4<sup>+</sup> (a) and CD8<sup>+</sup> (c) T cells in PBMCs from 10-day culture after stimulation (n=90 for COVID-19, n=69 for close contacts and n=63 for healthy donors), and in CD4<sup>+</sup> (b) and CD8<sup>+</sup> (d) T cells in PBMCs stimulated overnight (n=89 for COVID-19, n=69 for close contacts and n=30 for healthy donors). Data are presented as mean frequencies of IFN $\gamma$ +CD4<sup>+</sup>/CD8<sup>+</sup> T cells +/- SEM. Student's t test was performed with two-sided p value as indicated.

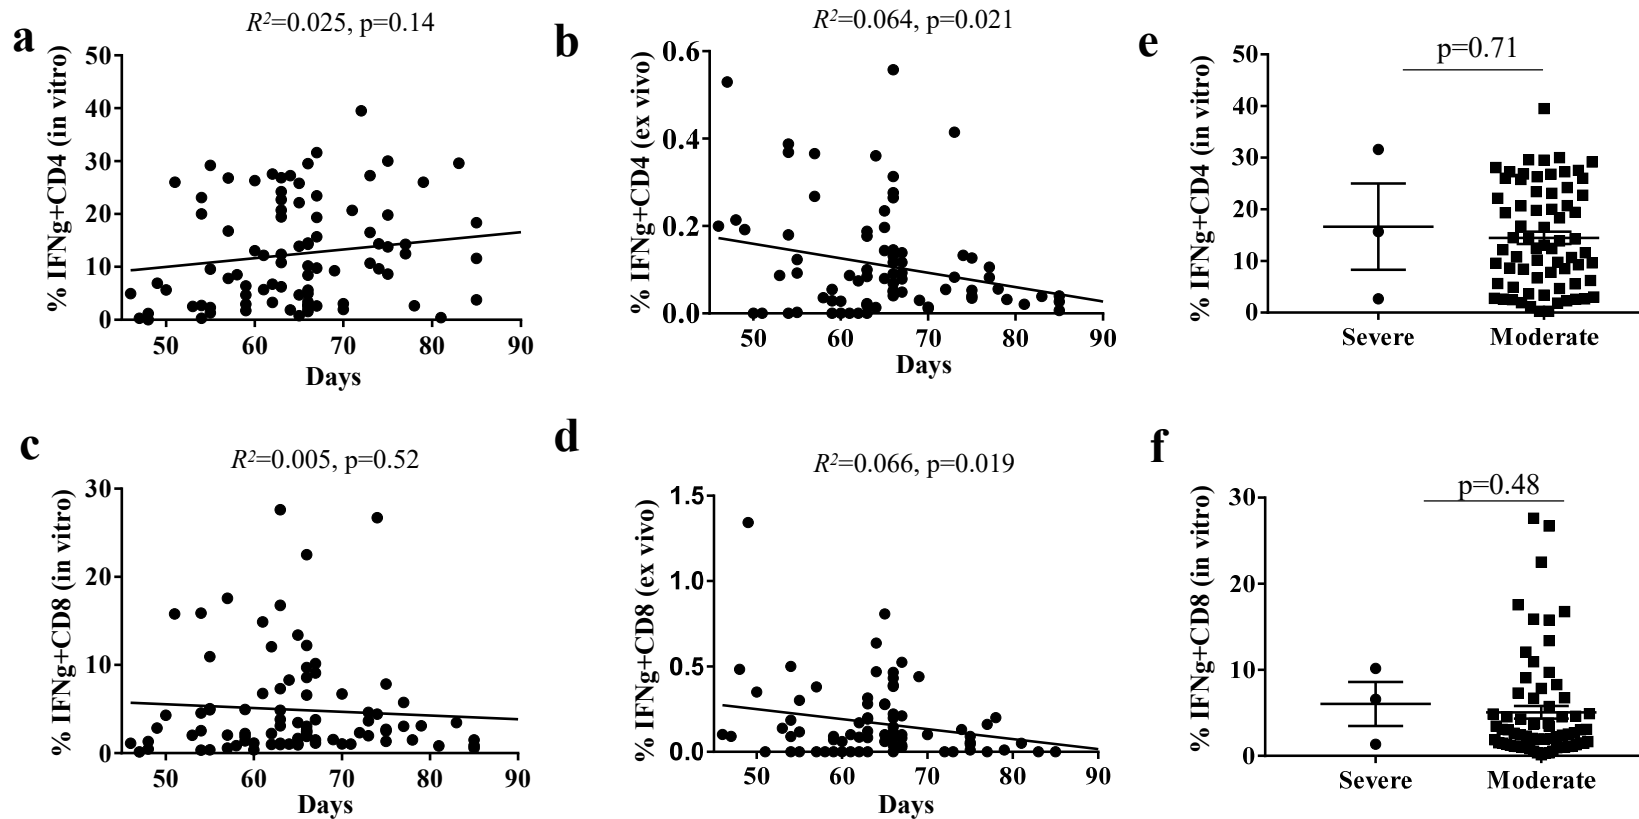

**Supplementary Figure 2: No change in IFN $\gamma$  producing CD4 $^+$  or CD8 $^+$  T cells over time.** PBMCs were stimulated overnight or expanded for 10 days with SARS-CoV-2 peptides and immuno-stained. IFN $\gamma$  expressing cells were analyzed with FACS. Correlations of in vitro expansion (a, c) (n=90) and overnight stimulation (b, d) (n=89) of the IFN $\gamma^+$  CD4 $^+$  (a, b) and CD8 $^+$  (c, d) T cells with the days upon disease onset. (e, f) Comparison of in vitro CD4 $^+$  (e) and CD8 $^+$  (f) T cell expansion between patients after recovery from severe (n=3) or moderate disease (n=69). Statistical analysis was carried out with the linear regression method, with  $p$  values as indicated for a-d. Student's  $t$  test was performed with two-sided  $p$  values as indicated for e and f. Data are presented as mean frequencies of IFN $\gamma^+$ CD4 $^+$ /CD8 $^+$  T cells +/- SEM.

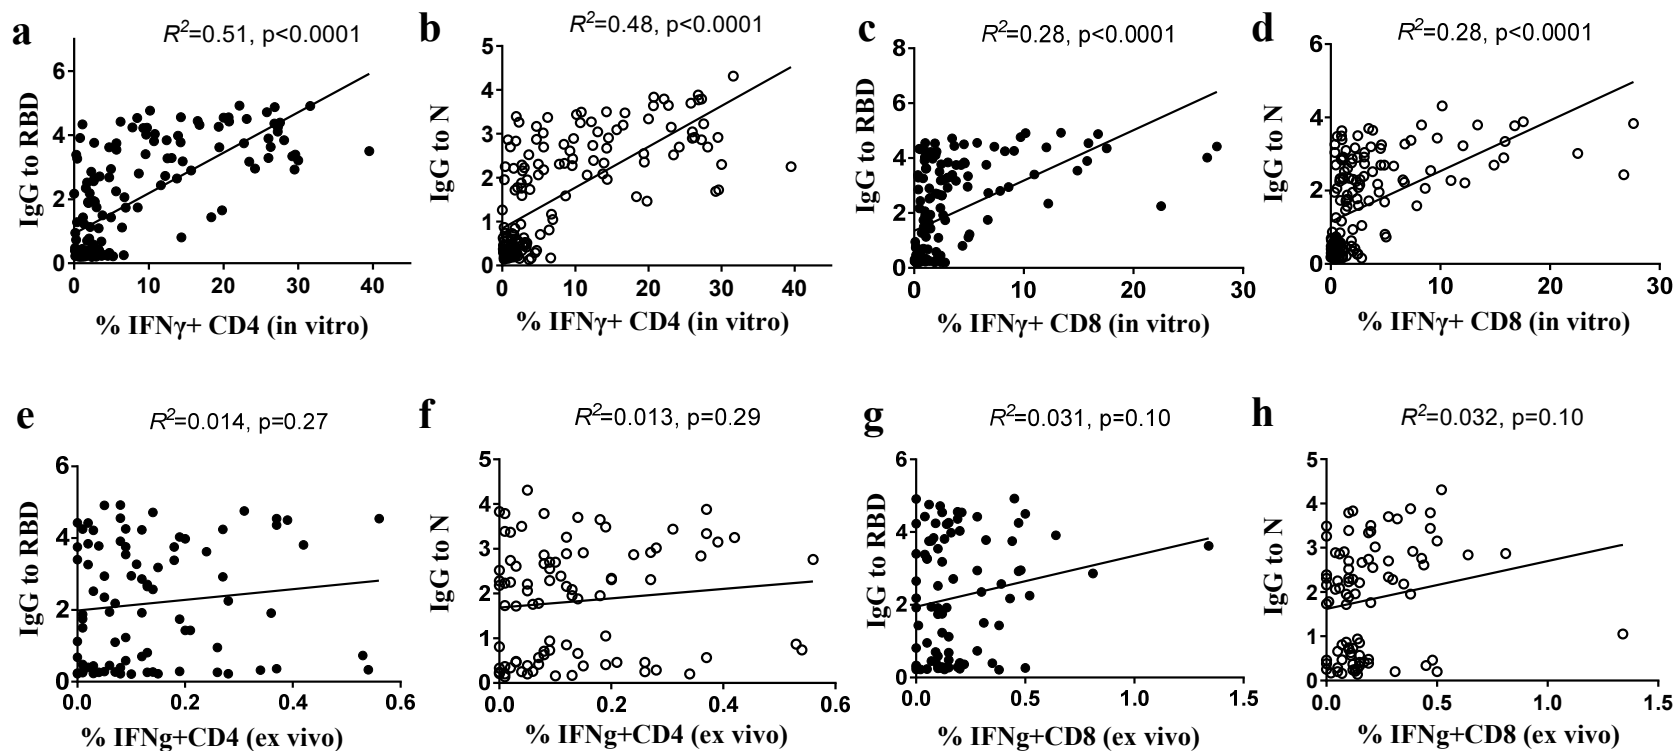

**Supplementary Figure 3: Correlations between the T cell immunity and antibody responses against SARS-CoV-2.**

PBMCs were stimulated for overnight or expanded for 10 days after stimulation with SARS-CoV-2 peptides and immunostained as described in Figure 1 and the Methods section. Antibodies presence in the blood plasma were determined with ELISA. Top panel: Frequencies of IFN $\gamma$  expressing CD4<sup>+</sup> (a, b) and CD8<sup>+</sup> (c, d) T cells are plotted against the antibody titers specific to SARS-CoV-2 RBD (a and c, closed circle) and N protein (c and d, open circle) after 10-day expansion (n=159). Bottom panel: Frequencies of IFN $\gamma$  expressing CD4<sup>+</sup> (e, f) and CD8<sup>+</sup> (g, h) T cells are plotted against the antibody titers specific to SARS-CoV-2 RBD (e and g, closed circle) and N protein (f and h, open circle) after overnight stimulation (n=89). Statistical analysis was carried out with linear regression method, with two-sided p values as indicated. Data were pooled from multiple experiments.

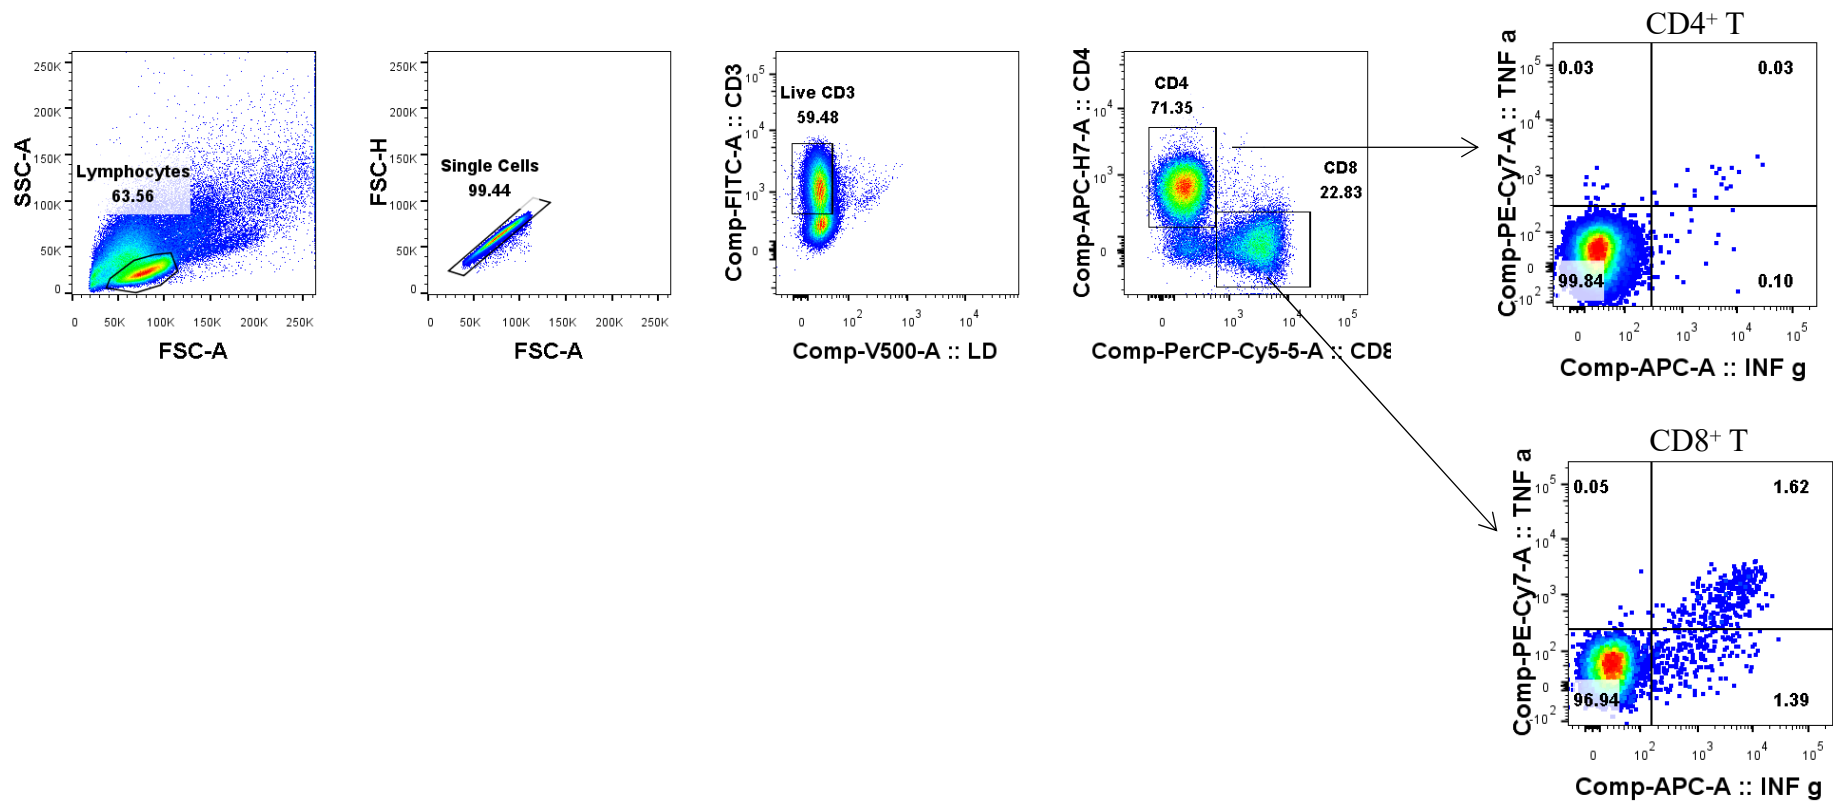

**Supplementary Figure 4: Gating strategy for our flow cytometry experiments.** PBMCs were stimulated for overnight or expanded for 10 days after stimulation with SARS-CoV-2 peptides and then were immuno-stained for surface and intracellular. Live CD3 were gated from singlets derived from lymphocytes, based on live CD3, CD4 and CD8 were further gated on IFN $\gamma$  and TNF. The gating strategy was applied to generation of data at Figure 1-3 and supplementary Figure 1-3.

**Supplementary Table 1. Demographics and antibody titer of all subjects.**

| Subject No. | Symptoms | Age         | Gender    | days from disease onset | IgG (N+S)   | IgG (N)     | IgG (S RBD) | IgM (N+S)   | nAb unit    |
|-------------|----------|-------------|-----------|-------------------------|-------------|-------------|-------------|-------------|-------------|
| co-015      | A        | 59          | F         | 48                      | 41.6        | 1.3         | 2.2         | 4.0         | 309         |
| co-038      | A        | 16          | M         | 66                      | 152.2       | 2.1         | 2.9         | 1.0         | 161         |
| co-051      | A        | 13          | F         | 57                      | 97.6        | 2.2         | 2.4         | 3.5         | 287         |
| co-086      | A        | 32          | M         | 67                      | 91.7        | 2.9         | 3.9         | 25.9        | 655         |
| co-089      | A        | 71          | F         | 49                      | 21.9        | 1.1         | 1.7         | 0.9         | 136         |
| co-090      | A        | 56          | F         | 67                      | 131.3       | 2.9         | 3.6         | 3.3         | 1984        |
| co-092      | A        | 13          | M         | 48                      | 95.4        | 1.8         | 2.2         | 1.1         | 191         |
| co-096      | A        | 64          | F         | 55                      | 144.3       | 2.7         | 3.5         | 4.0         | 1038        |
| co-097      | A        | 66          | M         | 55                      | 27.3        | 0.7         | 1.2         | 0.7         | 236         |
| co-102      | A        | 51          | F         | 66                      | 77.7        | 2.1         | 2.7         | 5.5         | 289         |
| co-107      | A        | 31          | F         | 83                      | 5.0         | 0.5         | 0.4         | 0.5         |             |
| co-108      | A        | 52          | M         | 83                      | 16.5        | 0.8         | 1.1         | 0.6         |             |
| co-109      | A        | 52          | F         | 83                      | 30.5        | 1.7         | 2.5         | 6.1         |             |
| co-110      | A        | 55          | F         | 74                      | 84.1        | 2.7         | 4.3         | 3.4         |             |
| co-137      | A        | 16          | F         | 85                      | 72.3        | 1.7         | 1.5         | 5.9         |             |
| co-144      | A        | 36          | F         | 78                      | 107.8       | 2.0         | 2.5         | 4.1         |             |
| co-155      | A        | 11          | F         | 77                      | 101.5       | 2.3         | 3.3         | 11.0        |             |
| co-159      | A        | 39          | F         | 64                      | 6.3         | 0.4         | 1.1         | 1.1         |             |
|             |          | <b>Mean</b> | <b>%M</b> | <b>Mean</b>             | <b>Mean</b> | <b>Mean</b> | <b>Mean</b> | <b>Mean</b> | <b>Mean</b> |
|             |          | <b>41</b>   | <b>28</b> | <b>67</b>               | <b>72.5</b> | <b>1.8</b>  | <b>2.4</b>  | <b>4.6</b>  | <b>569</b>  |
| co-001      | M        | 39          | F         | 64                      | 118.9       | 2.8         | 1.9         | 7.9         | 190         |
| co-002      | M        | 53          | M         | 66                      | 71.2        | 3.0         | 2.3         | 6.7         | 1161        |
| co-003      | M        | 50          | F         | 66                      | 103.9       | 2.9         | 2.9         | 7.0         | 1209        |
| co-005      | M        | 60          | M         | 63                      | 107.8       | 3.8         | 4.9         | 4.5         | 294         |
| co-006      | M        | 52          | M         | 63                      | 145.8       | 3.4         | 4.4         | 3.3         | 726         |
| co-007      | M        | 52          | F         | 65                      | 102.6       | 2.3         | 4.0         | 1.0         | 1739        |
| co-008      | M        | 45          | M         | 63                      | 114.1       | 2.4         | 3.6         | 5.7         | 1045        |
| co-009      | M        | 40          | M         | 60                      | 116.7       | 3.0         | 3.3         | 6.5         | 635         |
| co-011      | M        | 33          | F         | 62                      | 143.8       | 3.2         | 4.4         | 6.6         | 862         |
| co-012      | M        | 62          | F         | 57                      | 139.9       | 3.9         | 4.4         | 29.7        | 839         |
| co-013      | M        | 36          | F         | 55                      | 77.4        | 1.7         | 3.3         | 3.3         | 340         |
| co-014      | M        | 36          | M         | 54                      | 65.5        | 1.6         | 2.6         | 1.1         | 697         |
| co-017      | M        | 52          | F         | 54                      | 116.0       | 3.2         | 4.5         | 26.9        | 935         |
| co-018      | M        | 62          | F         | 54                      | 96.7        | 3.3         | 4.5         | 4.6         | 1175        |
| co-022      | M        | 65          | F         | 51                      | 100.6       | 2.9         | 3.9         | 5.6         | 1014        |
| co-023      | M        | 53          | F         | 57                      | 131.6       | 3.5         | 4.3         | 50.2        | 925         |
| co-024      | M        | 62          | F         | 60                      | 134.1       | 2.9         | 3.6         | 17.4        | 746         |
| co-027      | M        | 57          | M         | 48                      | 15.6        | 0.5         | 1.4         | 0.5         | 394         |
| co-029      | M        | 46          | M         | 66                      | 98.0        | 2.8         | 4.5         | 31.0        | 899         |
| co-030      | M        | 43          | F         | 64                      | 135.6       | 3.8         | 4.3         | 31.5        | 235         |
| co-032      | M        | 53          | M         | 61                      | 151.2       | 3.3         | 2.7         | 1.2         | 527         |
| co-035      | M        | 56          | M         | 63                      | 112.8       | 3.8         | 4.4         | 38.6        | 1227        |
| co-036      | M        | 71          | M         | 50                      | 76.9        | 2.2         | 3.8         | 2.1         | 415         |
| co-037      | M        | 48          | M         | 66                      | 86.7        | 2.2         | 1.9         | 0.9         | 311         |
| co-039      | M        | 70          | F         | 66                      | 129.6       | 3.4         | 4.8         | 1.1         | 1841        |
| co-042      | M        | 25          | M         | 63                      | 142.0       | 3.5         | 4.0         | 4.1         | 511         |
| co-043      | M        | 47          | F         | 73                      | 143.4       | 2.9         | 4.1         | 3.0         | 1176        |
| co-045      | M        | 40          | M         | 66                      | 133.2       | 2.9         | 3.2         | 19.4        | 546         |
| co-046      | M        | 45          | F         | 66                      | 156.7       | 3.5         | 3.8         | 3.3         | 360         |
| co-049      | M        | 34          | F         | 55                      | 161.4       | 3.3         | 2.9         | 7.7         | 1447        |
| co-050      | M        | 42          | M         | 53                      | 18.9        | 0.9         | 0.6         | 5.6         | 47          |
| co-053      | M        | 56          | M         | 57                      | 108.1       | 2.3         | 4.2         | 2.7         | 602         |
| co-054      | M        | 57          | F         | 55                      | 84.7        | 2.3         | 3.4         | 6.7         | 260         |
| co-057      | M        | 42          | M         | 58                      | 109.7       | 2.3         | 1.7         | 9.7         | 211         |
| co-061      | M        | 30          | M         | 62                      | 40.1        | 1.2         | 2.1         | 1.5         | 152         |
| co-062      | M        | 31          | M         | 63                      | 74.8        | 2.7         | 3.8         | 3.8         | 694         |
| co-064      | M        | 35          | F         | 47                      | 20.6        | 0.9         | 0.7         | 0.6         | 89          |
| co-065      | M        | 37          | M         | 54                      | 88.1        | 2.0         | 3.4         | 3.7         | 167         |
| co-066      | M        | 40          | F         | 67                      | 86.4        | 1.9         | 2.6         | 1.1         | 573         |
| co-067      | M        | 51          | F         | 71                      | 166.8       | 3.6         | 4.6         | 4.9         | 380         |

|        |   |    |   |    |       |     |     |       |      |
|--------|---|----|---|----|-------|-----|-----|-------|------|
| co-068 | M | 51 | M | 67 | 110.4 | 2.9 | 4.2 | 4.3   | 999  |
| co-072 | M | 37 | F | 63 | 162.0 | 3.7 | 3.8 | 38.6  | 437  |
| co-077 | M | 27 | F | 46 | 88.8  | 2.3 | 1.4 | 3.5   | 1105 |
| co-093 | M | 32 | F | 63 | 131.6 | 2.7 | 3.0 | 13.4  | 545  |
| co-100 | M | 16 | M | 75 | 70.5  | 1.6 | 2.8 | 5.9   | 452  |
| co-101 | M | 19 | F | 66 | 69.0  | 2.0 | 2.7 | 3.5   | 358  |
| co-104 | M | 50 | M | 59 | 142.4 | 3.2 | 2.7 | 5.5   | 290  |
| co-112 | M | 54 | M | 74 | 126.6 | 3.2 | 4.4 | 7.3   |      |
| co-113 | M | 52 | F | 75 | 108.0 | 2.4 | 4.0 | 2.7   |      |
| co-114 | M | 52 | M | 71 | 91.8  | 2.2 | 1.7 | 11.0  |      |
| co-115 | M | 53 | M | 70 | 87.3  | 2.6 | 4.2 | 26.8  |      |
| co-118 | M | 57 | M | 66 | 156.7 | 3.8 | 4.9 | 46.8  |      |
| co-119 | M | 77 | F | 66 | 155.9 | 3.7 | 4.7 | 120.6 |      |
| co-120 | M | 53 | M | 68 | 135.1 | 2.5 | 4.3 | 1.4   |      |
| co-121 | M | 52 | F | 58 | 126.5 | 2.5 | 3.2 | 26.6  |      |
| co-122 | M | 41 | M | 75 | 115.5 | 2.3 | 3.2 | 8.3   |      |
| co-126 | M | 48 | M | 77 | 102.4 | 2.4 | 3.3 | 12.0  |      |
| co-128 | M | 46 | F | 79 | 115.1 | 2.7 | 3.8 | 6.8   |      |
| co-133 | M | 37 | M | 79 | 151.8 | 3.0 | 3.3 | 2.8   |      |
| co-134 | M | 42 | M | 83 | 72.2  | 1.7 | 3.4 | 2.4   |      |
| co-135 | M | 41 | F | 86 | 85.4  | 1.6 | 1.4 | 5.1   |      |
| co-136 | M | 19 | M | 85 | 94.4  | 2.1 | 2.4 | 14.3  |      |
| co-138 | M | 32 | M | 75 | 70.1  | 1.5 | 1.7 | 4.9   |      |
| co-148 | M | 42 | F | 73 | 119.5 | 3.3 | 3.8 | 17.3  |      |
| co-152 | M | 39 | M | 77 | 126.8 | 2.7 | 4.6 | 13.6  |      |
| co-153 | M | 60 | F | 72 | 105.9 | 2.3 | 3.5 | 6.6   |      |
| co-156 | M | 51 | M | 70 | 127.2 | 3.4 | 1.9 | 6.7   |      |
| co-157 | M | 50 | F | 67 | 73.1  | 2.5 | 0.7 | 3.5   |      |
| co-158 | M | 20 | M | 65 | 98.5  | 1.8 | 1.9 | 1.9   |      |
| co-069 | S | 62 | M | 67 | 50.1  | 3.1 | 2.9 | 116.3 | 1997 |
| co-085 | S | 59 | M | 67 | 135.5 | 4.3 | 4.9 | 15.1  | 523  |
| co-099 | S | 49 | M | 66 | 81.8  | 2.3 | 3.8 | 8.9   | 689  |

|  |  | <b>Mean</b> | <b>%M</b>   | <b>Mean</b> | <b>Mean</b>  | <b>Mean</b> | <b>Mean</b> | <b>Mean</b> | <b>Mean</b> |
|--|--|-------------|-------------|-------------|--------------|-------------|-------------|-------------|-------------|
|  |  | <b>46</b>   | <b>55.5</b> | <b>65</b>   | <b>107.2</b> | <b>2.7</b>  | <b>3.3</b>  | <b>13.0</b> | <b>700</b>  |

|        |   |    |   |  |      |     |     |      |  |
|--------|---|----|---|--|------|-----|-----|------|--|
| co-004 | H | 37 | M |  | 0.8  | 0.4 | 0.2 | 0.6  |  |
| co-010 | H | 64 | F |  | 0.3  | 0.3 | 0.8 | 4.0  |  |
| co-016 | H | 61 | M |  | 0.9  | 0.3 | 0.3 | 5.4  |  |
| co-019 | H | 61 | M |  | 1.6  | 0.3 | 0.4 | 0.5  |  |
| co-020 | H | 66 | M |  | 0.3  | 0.3 | 0.2 | 0.6  |  |
| co-021 | H | 39 | M |  | 3.1  | 0.3 | 0.3 | 0.5  |  |
| co-025 | H | 63 | M |  | 1.7  | 0.7 | 0.3 | 0.3  |  |
| co-026 | H | 36 | M |  | 0.9  | 0.5 | 0.2 | 0.3  |  |
| co-028 | H | 24 | M |  | 0.3  | 0.2 | 0.3 | 0.4  |  |
| co-031 | H | 45 | M |  | 0.4  | 0.7 | 0.3 | 0.8  |  |
| co-033 | H | 56 | F |  | 1.7  | 0.6 | 0.2 | 1.1  |  |
| co-034 | H | 35 | M |  | 0.6  | 0.3 | 0.2 | 0.6  |  |
| co-040 | H | 47 | F |  | 0.9  | 0.4 | 0.3 | 15.8 |  |
| co-041 | H | 51 | M |  | 0.7  | 0.3 | 0.2 | 1.3  |  |
| co-044 | H | 47 | M |  | 1.5  | 0.3 | 0.3 | 2.1  |  |
| co-047 | H | 70 | F |  | 0.2  | 0.6 | 0.4 | 2.7  |  |
| co-048 | H | 45 | M |  | 0.2  | 0.6 | 0.3 | 0.6  |  |
| co-052 | H | 12 | F |  | 0.6  | 0.3 | 0.3 | 0.8  |  |
| co-055 | H | 18 | M |  | 0.3  | 0.2 | 0.2 | 2.3  |  |
| co-056 | H | 23 | M |  | 0.9  | 0.6 | 0.4 | 1.0  |  |
| co-058 | H | 18 | F |  | 0.5  | 0.5 | 1.0 | 0.8  |  |
| co-059 | H | 38 | F |  | 1.7  | 0.5 | 0.3 | 0.3  |  |
| co-060 | H | 17 | F |  | 0.3  | 0.3 | 0.3 | 0.8  |  |
| co-063 | H | 31 | F |  | 0.5  | 0.5 | 0.2 | 0.8  |  |
| co-070 | H | 24 | M |  | 0.2  | 0.2 | 0.2 | 0.4  |  |
| co-071 | H | 37 | M |  | 0.3  | 0.5 | 0.3 | 0.3  |  |
| co-073 | H | 8  | M |  | 1.0  | 0.2 | 0.3 | 0.4  |  |
| co-074 | H | 42 | M |  | 34.9 | 0.9 | 0.7 | 1.6  |  |
| co-075 | H | 53 | M |  | 0.8  | 0.7 | 0.3 | 1.2  |  |
| co-076 | H | 71 | M |  | 0.4  | 0.6 | 0.4 | 0.6  |  |
| co-078 | H | 58 | M |  | 1.5  | 0.2 | 0.3 | 0.5  |  |
| co-079 | H | 12 | M |  | 0.8  | 0.3 | 0.2 | 0.5  |  |
| co-080 | H | 12 | F |  | 0.8  | 0.3 | 0.2 | 0.5  |  |

|        |   |             |             |             |             |             |             |
|--------|---|-------------|-------------|-------------|-------------|-------------|-------------|
| co-081 | H | 40          | F           | 0.2         | 0.2         | 0.2         | 1.0         |
| co-082 | H | 32          | F           | 0.5         | 0.7         | 0.2         | 1.0         |
| co-083 | H | 10          | F           | 0.5         | 0.3         | 0.3         | 0.8         |
| co-084 | H | 56          | F           | 0.2         | 0.2         | 0.2         | 0.8         |
| co-087 | H | 47          | M           | 0.2         | 0.1         | 0.3         | 0.5         |
| co-088 | H | 50          | M           | 0.3         | 0.2         | 0.3         | 1.1         |
| co-091 | H | 34          | F           | 0.2         | 0.2         | 0.2         | 1.3         |
| co-094 | H | 34          | M           | 0.1         | 0.2         | 0.2         | 0.9         |
| co-095 | H | 7           | F           | 0.1         | 0.2         | 1.1         | 0.4         |
| co-098 | H | 35          | M           | 0.4         | 0.3         | 0.2         | 0.5         |
| co-103 | H | 48          | M           | 0.1         | 0.5         | 1.3         | 1.2         |
| co-105 | H | 49          | F           | 0.3         | 0.3         | 0.2         | 0.6         |
| co-106 | H | 48          | F           | 0.3         | 0.6         | 0.2         | 0.5         |
| co-111 | H | 42          | M           | 0.5         | 0.2         | 0.2         | 0.3         |
| co-116 | H | 12          | F           | 0.7         | 0.4         | 0.4         | 0.7         |
| co-117 | H | 50          | F           | 0.3         | 0.3         | 0.4         | 0.8         |
| co-123 | H | 20          | M           | 0.2         | 0.3         | 0.2         | 0.6         |
| co-124 | H | 12          | F           | 1.4         | 0.2         | 0.3         | 3.5         |
| co-125 | H | 43          | F           | 0.3         | 0.5         | 0.3         | 0.5         |
| co-127 | H | 70          | M           | 1.1         | 0.6         | 0.3         | 0.4         |
| co-129 | H | 22          | F           | 0.3         | 0.4         | 0.5         | 1.5         |
| co-130 | H | 52          | M           | 1.3         | 0.5         | 0.5         | 0.6         |
| co-131 | H | 35          | F           | 0.5         | 0.5         | 0.4         | 1.2         |
| co-132 | H | 58          | F           | 0.3         | 0.4         | 0.2         | 0.5         |
| co-139 | H | 58          | M           | 0.2         | 0.2         | 0.3         | 1.1         |
| co-140 | H | 31          | F           | 0.2         | 0.2         | 0.3         | 2.2         |
| co-141 | H | 55          | F           | 0.5         | 0.5         | 0.2         | 0.5         |
| co-142 | H | 54          | F           | 0.2         | 0.2         | 0.3         | 0.8         |
| co-143 | H | 9           | M           | 0.4         | 0.2         | 0.3         | 0.6         |
| co-145 | H | 41          | M           | 0.2         | 0.2         | 0.2         | 2.3         |
| co-146 | H | 14          | M           | 0.2         | 0.1         | 0.2         | 0.5         |
| co-147 | H | 75          | M           | 1.4         | 0.4         | 0.2         | 0.3         |
| co-149 | H | 7           | M           | 6.6         | 0.3         | 0.3         | 0.7         |
| co-150 | H | 60          | M           | 0.3         | 0.2         | 0.3         | 0.4         |
| co-151 | H | 32          | M           | 0.4         | 0.4         | 0.3         | 0.3         |
| co-154 | H | 36          | F           | 1.3         | 0.2         | 0.3         | 1.1         |
|        |   | <b>Mean</b> | <b>%M</b>   | <b>Mean</b> | <b>Mean</b> | <b>Mean</b> | <b>Mean</b> |
|        |   | <b>39</b>   | <b>57.9</b> | <b>1.2</b>  | <b>0.2</b>  | <b>0.3</b>  | <b>1.2</b>  |

A; asymptomatic; M: mild-moderate; S: severe, H; healthy (NAT-Ab-). nAb: neutralizing antibody titer. NA: not applicable; ND: not detectable.

**Supplementary Table 2.** Validation of three Ab assays

|                                                                                                             | Assay 1               |                   | Assay 2               |                   | Assay 3     |             |
|-------------------------------------------------------------------------------------------------------------|-----------------------|-------------------|-----------------------|-------------------|-------------|-------------|
|                                                                                                             | immunochromatographic |                   | immunochromatographic |                   | ELISA       |             |
|                                                                                                             | IgG<br>N+S            | IgM*<br>N+S       | IgG<br>N+S            | IgM*<br>N+S       | IgG<br>N    | IgG<br>sRBD |
| Number of negative controls<br>for method validation                                                        | 284                   | 286               | 188                   | 188               | 403         | 269         |
| Minimum                                                                                                     | 0.00                  | 0.00              | 0.29                  | 0.17              | 0.11        | 0.09        |
| 25% Percentile                                                                                              | 0.08                  | 0.14              | 1.23                  | 0.81              | 0.24        | 0.18        |
| Median                                                                                                      | 0.18                  | 0.24              | 1.87                  | 1.46              | 0.35        | 0.21        |
| 75% Percentile                                                                                              | 0.43                  | 0.38              | 3.20                  | 3.01              | 0.47        | 0.26        |
| Maximum                                                                                                     | 1.79                  | 1.91              | 18.73                 | 11.60             | 0.97        | 0.62        |
| <b>Mean</b>                                                                                                 | <b>0.26</b>           | <b>0.30</b>       | <b>2.67</b>           | <b>2.19</b>       | <b>0.38</b> | <b>0.23</b> |
| Std. Deviation                                                                                              | 0.23                  | 0.26              | 2.49                  | 2.03              | 0.19        | 0.09        |
| Std. Error of Mean                                                                                          | 0.01                  | 0.02              | 0.18                  | 0.15              | 0.01        | 0.01        |
| <b><i>Establishment of statistic parameters used this study with the 79 confirmed covid-19 patients</i></b> |                       |                   |                       |                   |             |             |
| Theoretical cut off<br>(Mean+3SD)                                                                           | 0.95                  | 1.08              | 10.15                 | 8.27              | 0.95        | 0.55        |
| <b>Cut off used in test</b>                                                                                 | <b>1</b>              | <b>1.1</b>        | <b>11</b>             | <b>10</b>         | <b>1</b>    | <b>1</b>    |
| False positive (%)                                                                                          | 0.70                  | 3.85              | 1.06                  | 1.06              | 0           | 0           |
| Specificity: Consistency with<br>NAT result (% of 79<br>confirmed cases)                                    | 93.6                  | 53.1 <sup>¶</sup> | 97.4                  | 26.5 <sup>¶</sup> | 91.1        | 94.9        |

\*: Reliable serum IgM titer is only detected within the first 3 weeks from disease onset (Fig. 3c)

¶: It was 48-86 days between their hospitalisation and the date of IgM assay for these 79 confirmed covid-19 patients.
